# Supplementary material for: Complexation behaviour of caffeic, ferulic and p-coumaric acids towards aluminium cations: a combined experimental and theoretical approach
Source: Royal Society of Chemistry journal article supplement (doi:10.1039/c7nj00661f), 2017-01-01
Supplement: c7nj00661f1.pdf [file c7nj00661f1.pdf]

Electronic Supplementary Information for

**Manuscript ID NJ-ART-02-2017-000661**

**New Journal of Chemistry**

**Complexation behaviour of caffeic, ferulic and *p*-coumaric acids towards aluminium cation: a combined experimental and theoretical approach**

Amerigo Beneduci, Emilia Furia\*, Nino Russo and Tiziana Marino

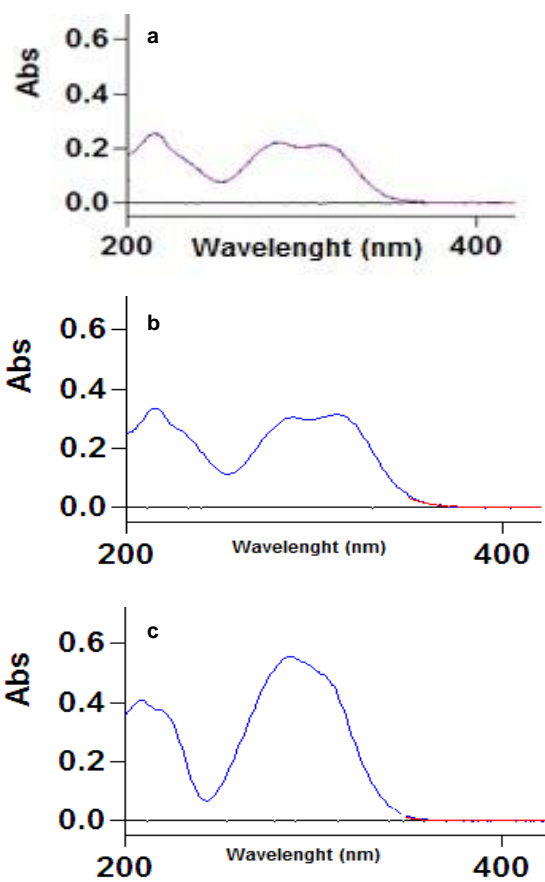

Figure S1. UV absorption spectra of caffeic acid (a), ferulic acid (b) and *p*-coumaric acids (c).

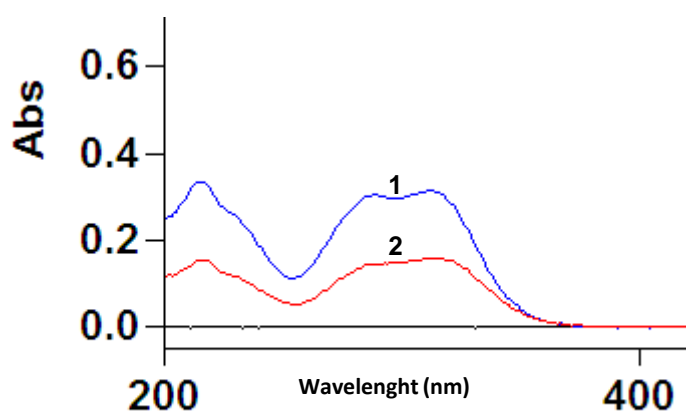

Figure S2. UV spectra at pH=3.5 of 0.1 mM ferulic acid free (line 1) and of the complexes formed between ligands and  $AlCl_3$  0.1 mM (line 2).

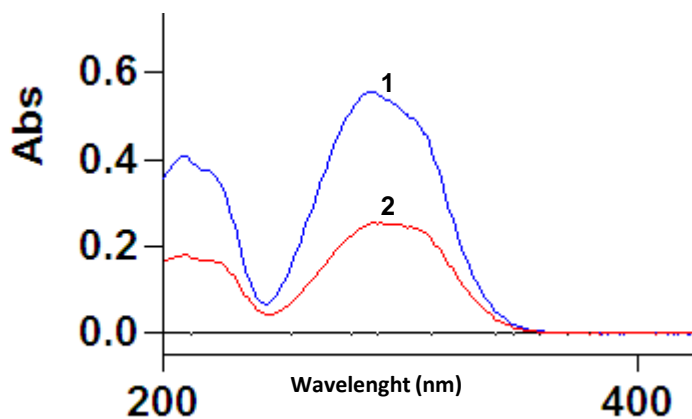

Figure S3. UV spectra at pH=3.5 of 0.1 mM *p*-coumaric acid free (line 1) and of the complexes formed between ligands and AlCl<sub>3</sub> 0.1 mM (line 2).

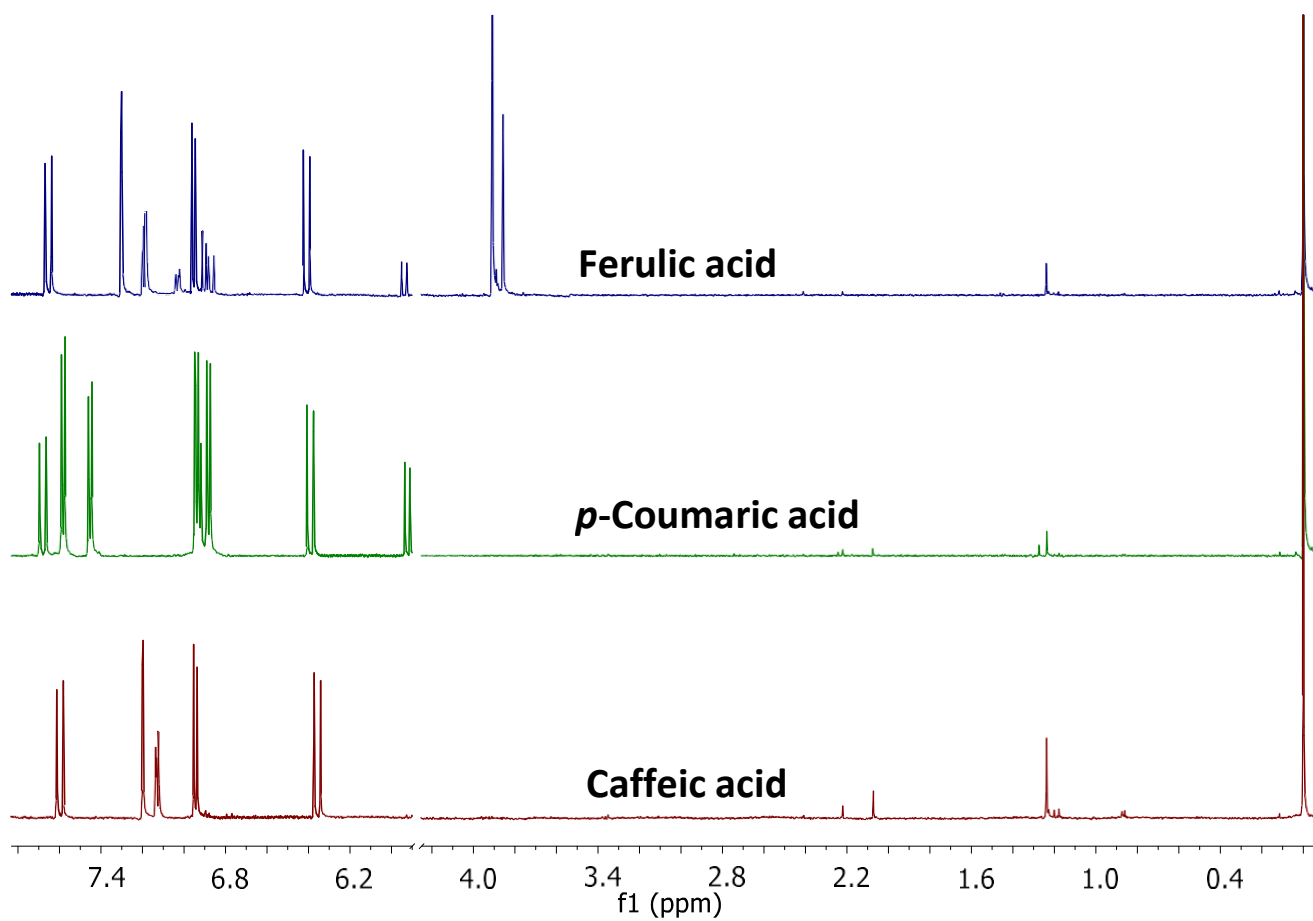

Figure S4. 1D <sup>1</sup>H-NMR spectra of caffeic, *p*-coumaric and ferulic acid at pH 3.5.

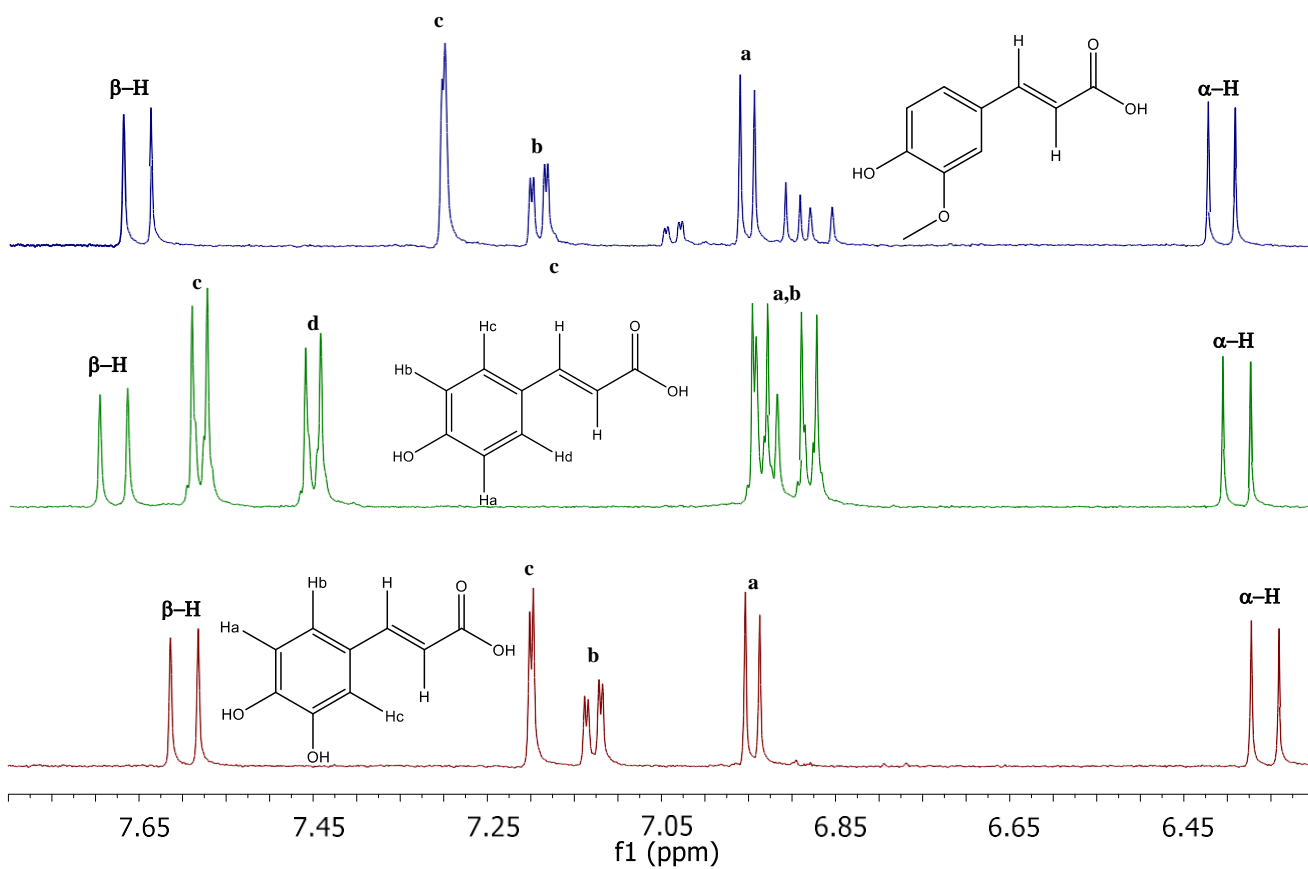

Figure S5.  $1\text{D } ^1\text{H-NMR}$  spectra of ferulic, *p*-coumaric and caffeic acids at pH 3.5 in the 6.3–7.8 ppm spectral range.

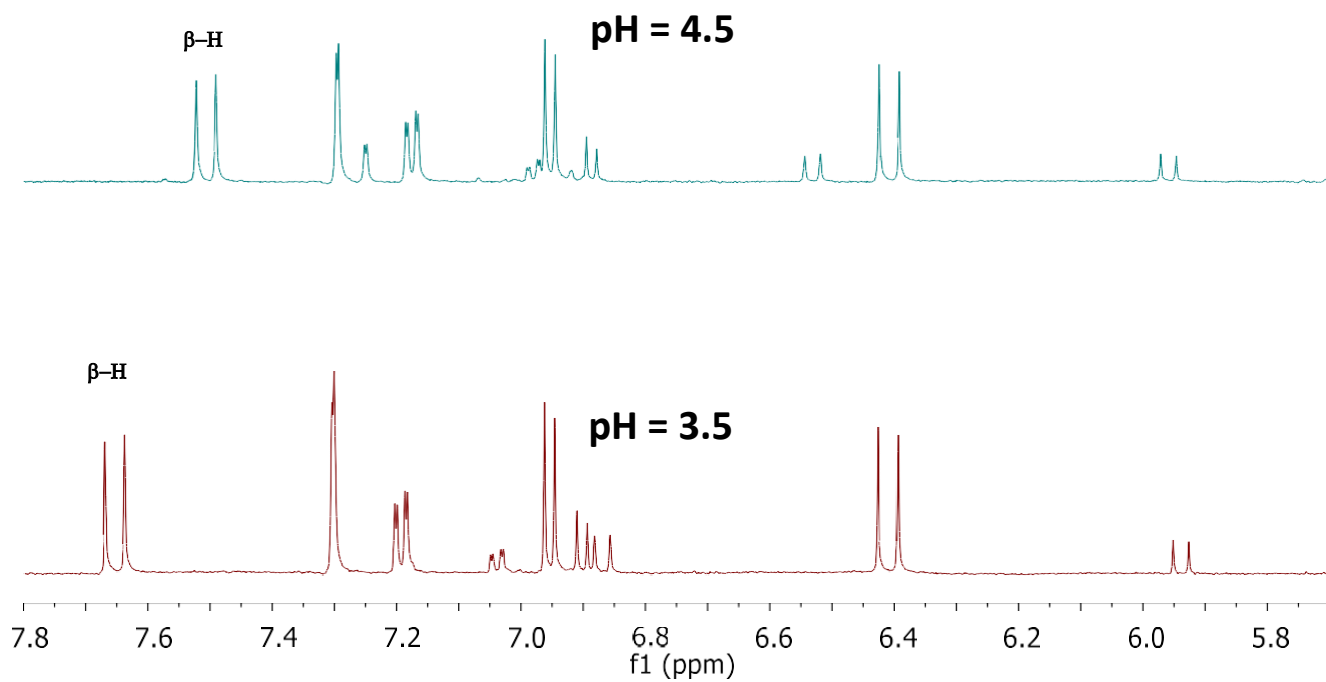

Figure S6. <sup>1</sup>H-NMR spectra of ferulic acid at different pH.

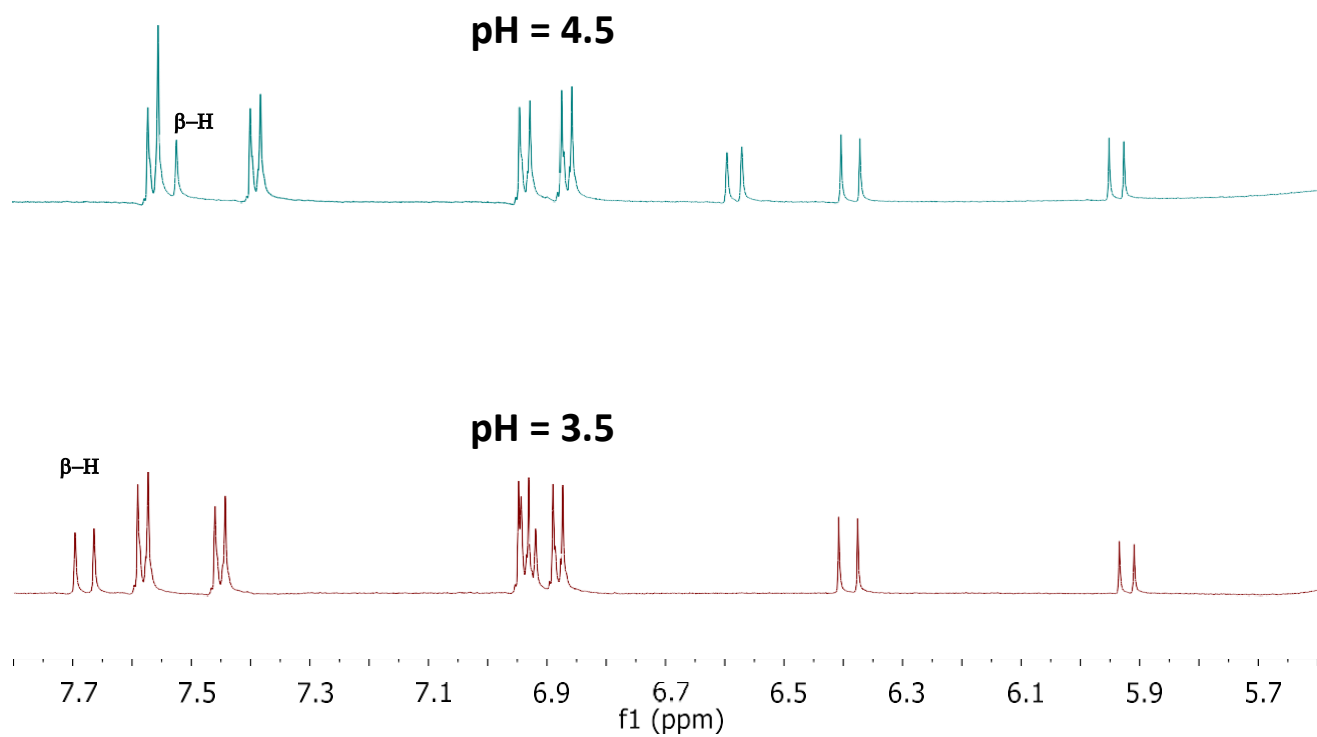

Figure S7. <sup>1</sup>H-NMR spectra of *p*-coumaric acid at different pH.

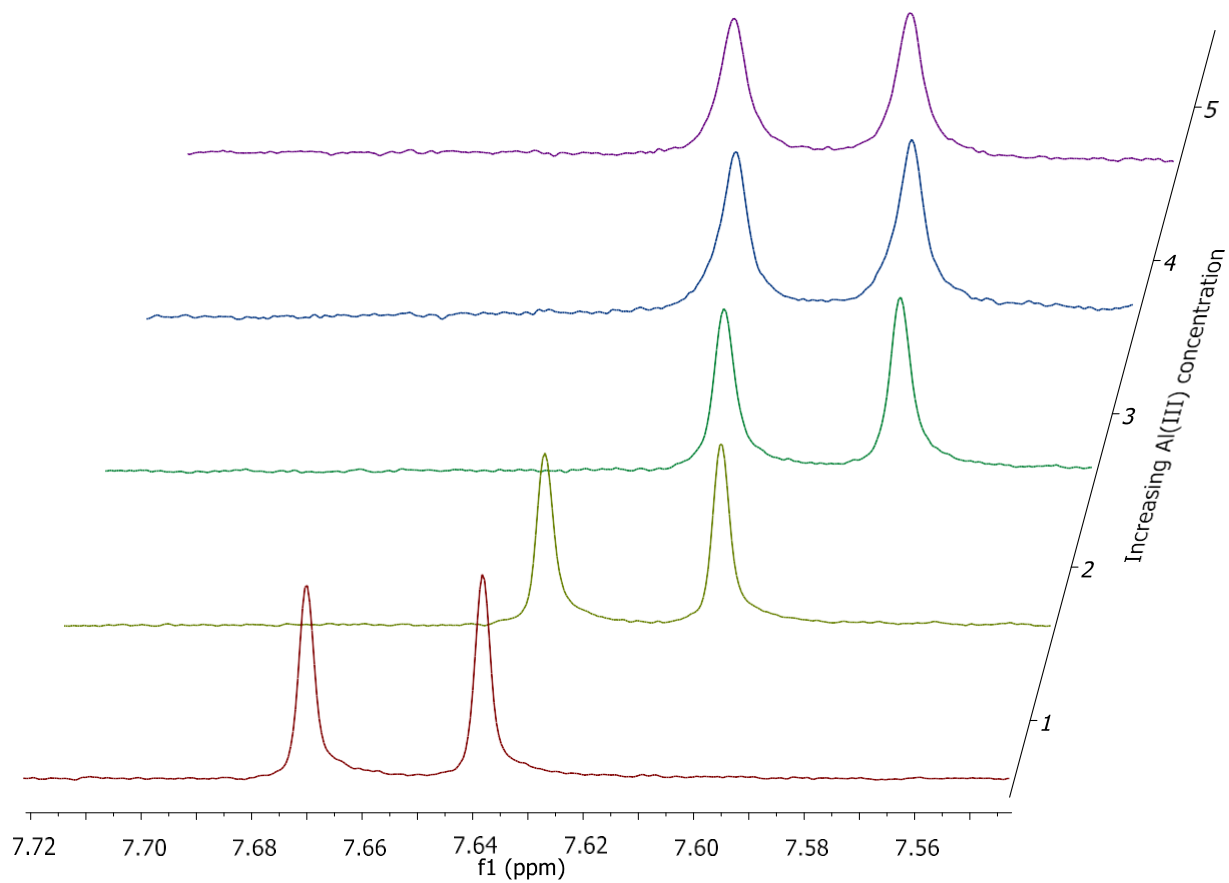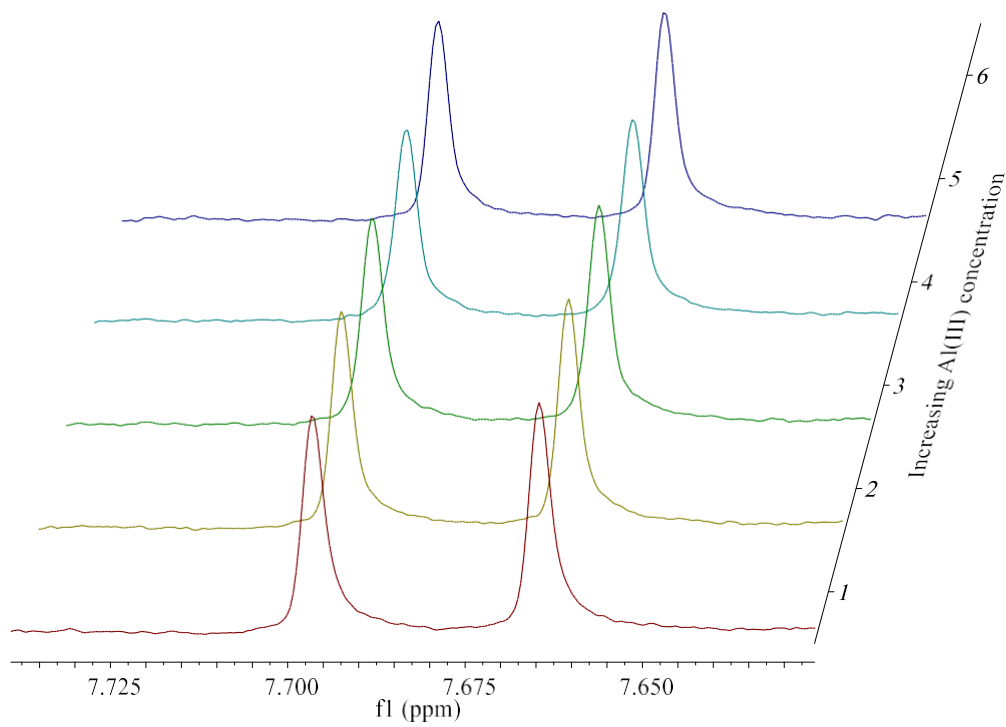

Figure S8. Up-field shift of the  $^1\text{H-NMR}$  doublet of the  $\beta$ -proton of ferulic and *p*-coumaric acids plotted as a function of increasing concentration of  $\text{Al}^{3+}$  at pH 3.5.

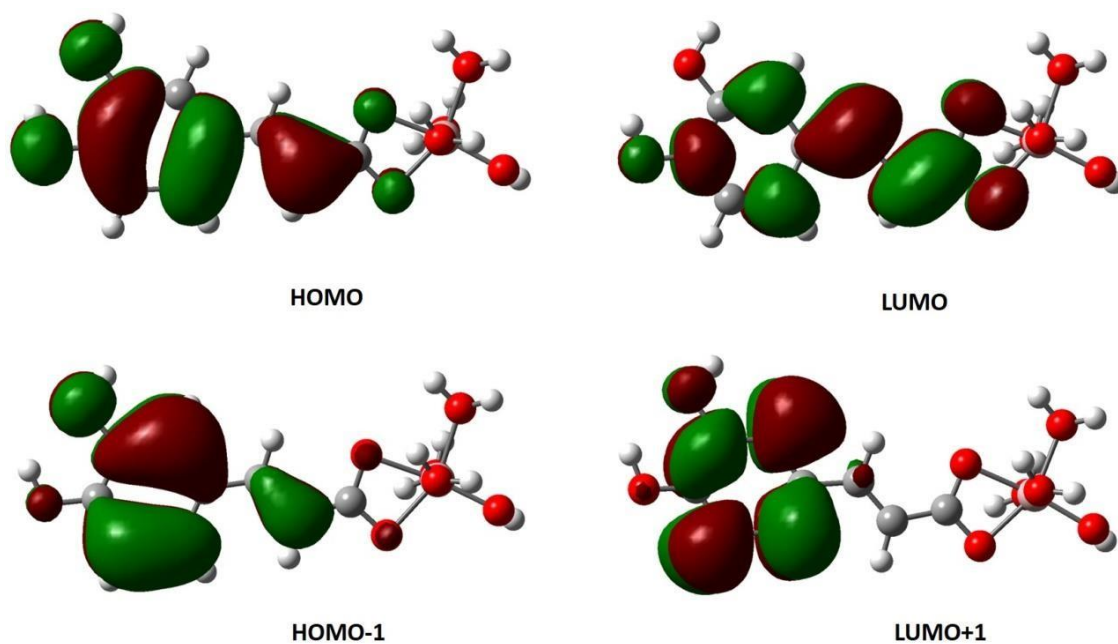

Figure S9. Four “Gouterman’s orbitals” of the lowest energy caffeic acid complex.

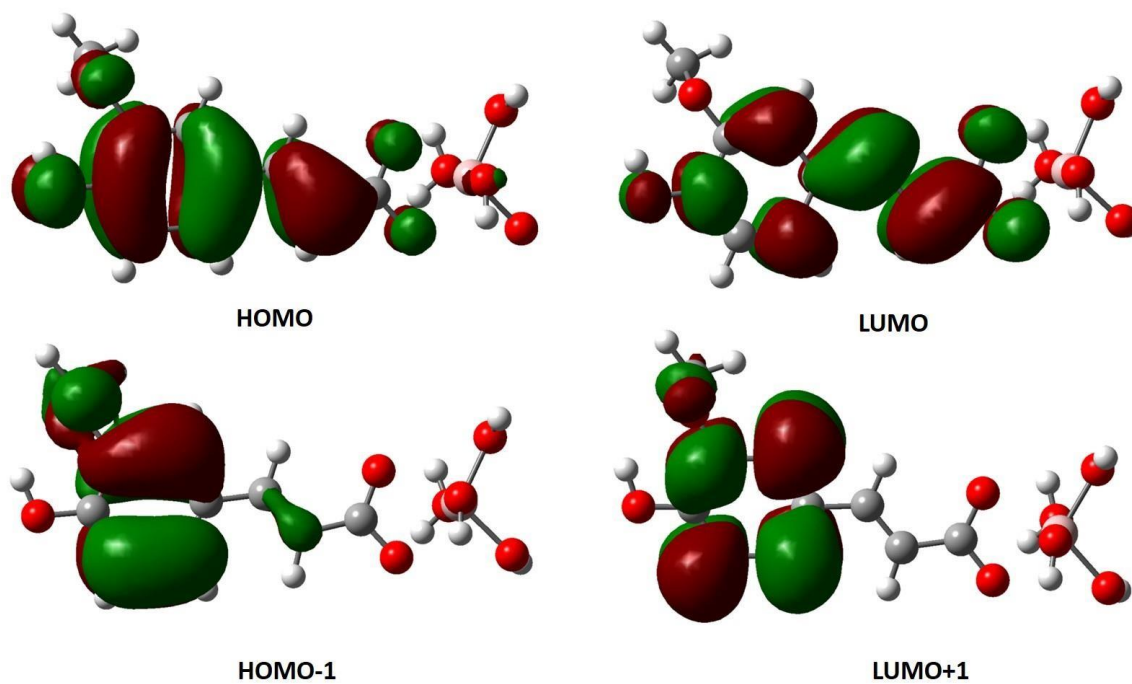

Figure S10. Four “Gouterman’s orbitals” of the lowest energy ferulic acid complex.

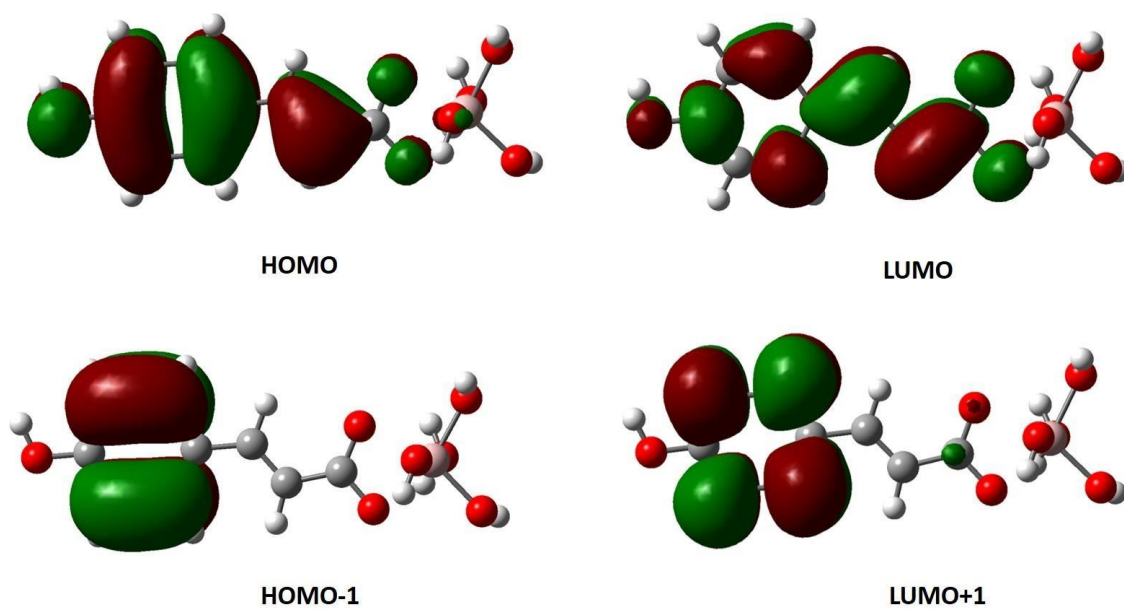

Figure S11. Four “Gouterman’s orbitals” of the lowest energy *p*-coumaric acid complex.



Table S1. Main excitation energies ( $\Delta E$ ), oscillator strengths (f) and MO contribution (%) computed for free ligands, calculated at (TD)-M052X/6-31G\* level of theory, in aqueous solution.

| Acids              | Bands | MO contribution                                                  | $\Delta E$ |      | f      |
|--------------------|-------|------------------------------------------------------------------|------------|------|--------|
|                    |       |                                                                  | nm         | eV   |        |
| Caffeic            | S1    | H $\rightarrow$ L (70%)                                          | 277        | 4.48 | 0.704  |
|                    | S2    | H-1 $\rightarrow$ L(53%); H $\rightarrow$ L+1 (45%)              | 213        | 5.83 | 0.572  |
|                    | S3    | H-4 $\rightarrow$ L (50%);H-1 $\rightarrow$ L+1(41% <sup>9</sup> | 195        | 6.36 | 0.211  |
|                    | S4    | H- $\rightarrow$ L+5 (63%); H-1 $\rightarrow$ L+1 (27%)          | 177        | 7.00 | 0.119  |
| Ferulic            | S1    | H $\rightarrow$ L (70%)                                          | 279        | 4.44 | 0.683  |
|                    | S2    | H-1 $\rightarrow$ L (54%); H $\rightarrow$ L+1 (46%)             | 214        | 5.60 | 0.669  |
|                    | S3    | H-1 $\rightarrow$ L+1(44%); H-5 $\rightarrow$ L                  | 194        | 6.38 | 0.186  |
|                    | S4    | (24%) H-1 $\rightarrow$ L+1(36%);                                | 178        | 6.94 | 0.163  |
| <i>p</i> -Coumaric | S1    | H $\rightarrow$ L (70%)                                          | 273        | 4.53 | 0.7596 |
|                    | S2    | H-1                                                              | 204        | 6.08 | 0.3435 |
|                    | S3    | $\rightarrow$ L(60%);H $\rightarrow$ L+1(37%) H-                 | 192        | 6.46 | 0.2929 |
|                    | S4    | 1 $\rightarrow$ L+1(46%)                                         | 175        | 7.08 | 0.3097 |
